# Supplementary material for: Thickness-dependent Schottky barrier height of MoS2field-effect transistors
Source: Royal Society of Chemistry journal article supplement (doi:10.1039/c7nr01501a), 2017-01-01
Supplement: c7nr01501a1.pdf [file c7nr01501a1.pdf]

## Electronic Supplementary Information

### Thickness-Dependent Schottky Barrier of MoS<sub>2</sub>

### Field-Effect Transistors

*Junyoung Kwon,* <sup>†a</sup> *Jong-Young Lee,* <sup>†a</sup> *Young-Jun Yu,* <sup>b</sup> *Chul-Ho Lee,* <sup>c</sup> *Xu Cui,* <sup>d</sup> *James Hone*<sup>d</sup>  
*and Gwan-Hyoung Lee*<sup>\*a</sup>

**a. Department of Materials Science and Engineering, Yonsei University, Seoul, 03722, Korea.**

**b. ICT Materials & Components Basic Research Group, Electronics and Telecommunications**

**c. KU-KIST Graduate School of Converging Science and Technology, Korea University, Seoul, 02841, Korea**

**d. Department of Mechanical Engineering, Columbia University, New York, New York 10027, USA**

**E-mail: gwanlee@yonsei.ac.kr**

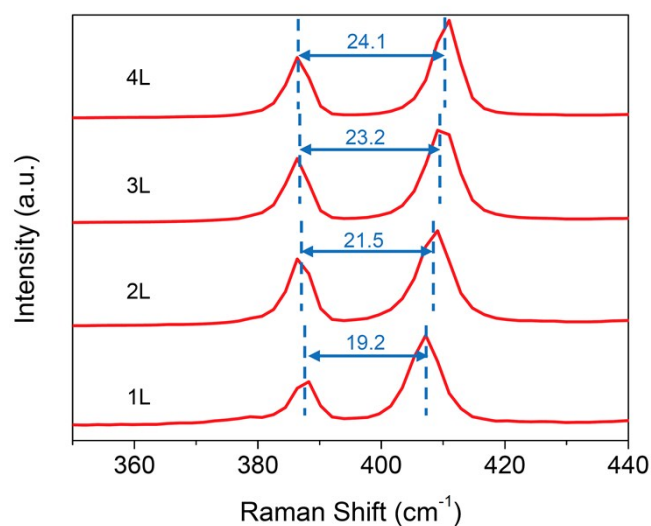

**Fig. S1. Layer dependent Raman spectrum of MoS<sub>2</sub> for verification of each layer thickness. There are two representative peaks for MoS<sub>2</sub>. Thickness of MoS<sub>2</sub> can be confirmed by space between two peaks. When MoS<sub>2</sub> is monolayer, it shows space about 19cm<sup>-1</sup> and be widened gradually as thickness increases. Space between two representative peaks of 1L, 2L, 3L, and 4L are 19.2, 21.5, 23.2, 24.1 cm<sup>-1</sup>, respectively. They are corresponding to previously reported literature values.**

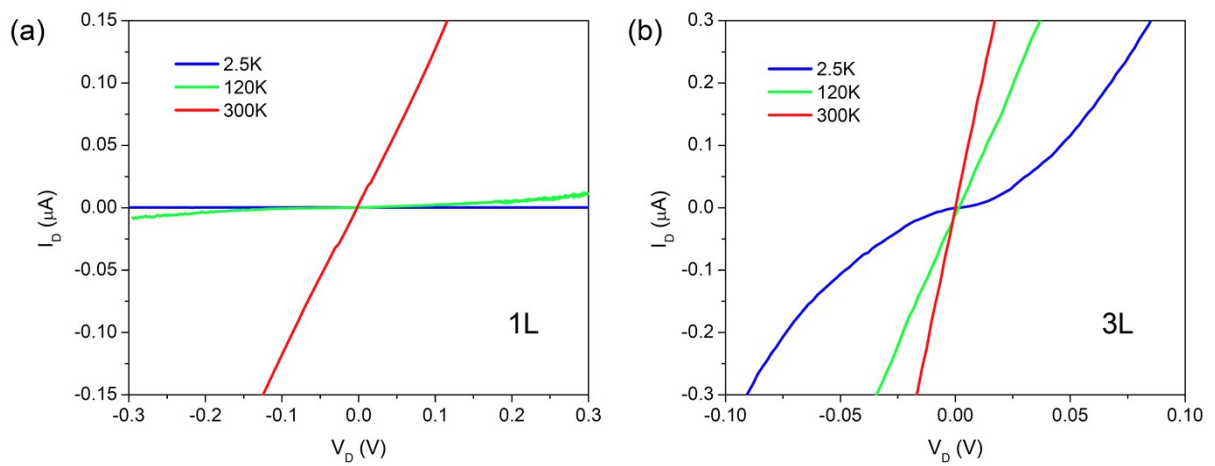

**Fig. S2. Output characteristics of (a) 1L and (b) 3L MoS<sub>2</sub> FETs at different temperature. As temperature decreases, output curves of both 1L and 3L devices become non-linear, indicating that there is a Schottky barrier for both devices, which cannot be neglected. In most of previous reports, it was said that metal can form Ohmic contacts to MoS<sub>2</sub> regardless of their work functions. However, it just seems like that because thermal energy allows carriers to overcome the contact barrier at high temperature. From low temperature measurement, we realized that more systematic studies are needed, especially for thinner MoS<sub>2</sub> like 1-3L.**

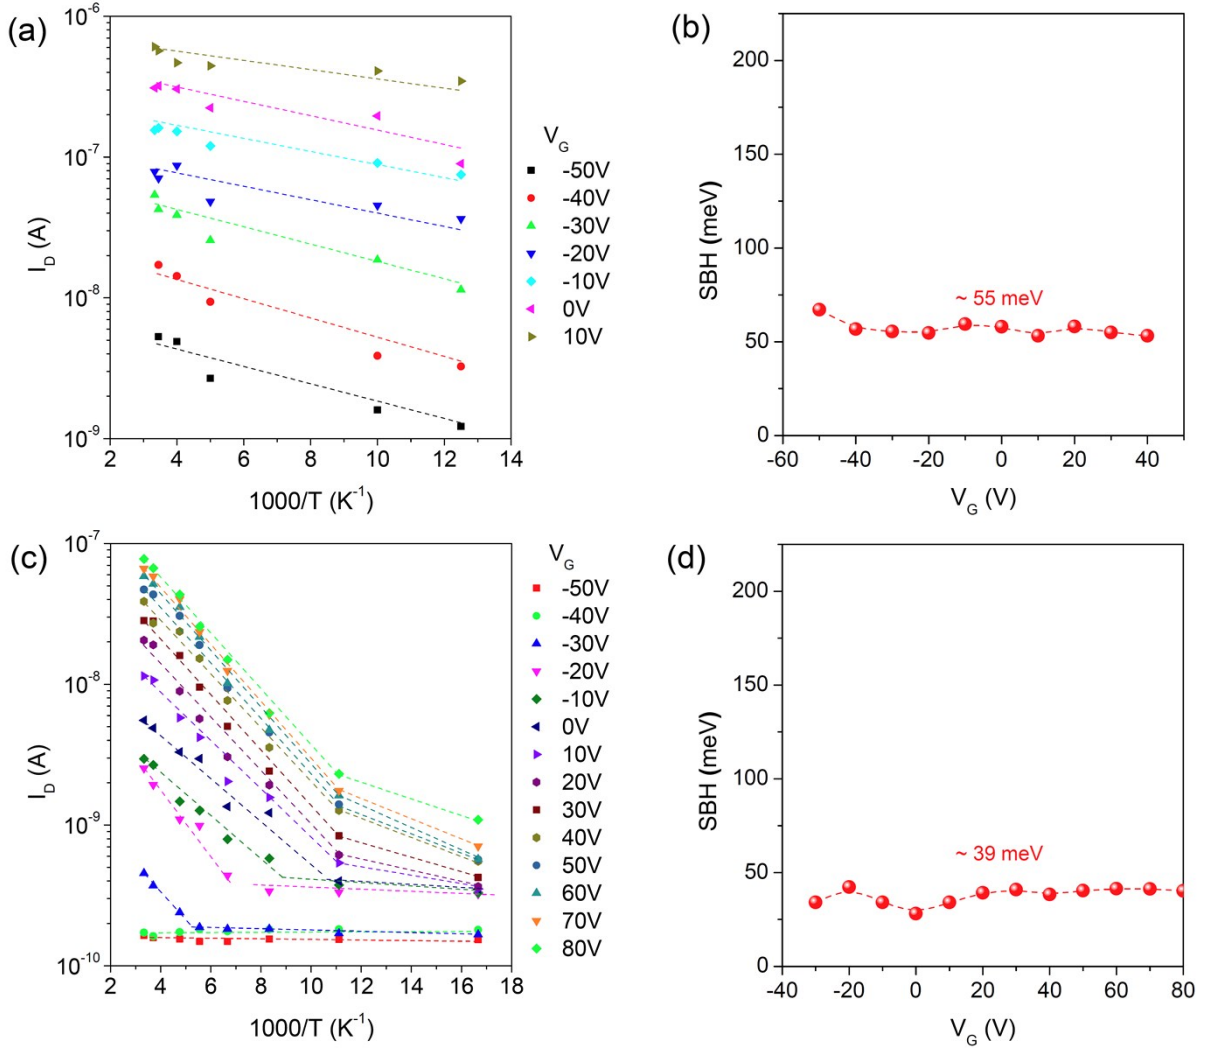

**Fig. S3. (a) Temperature dependence of drain current ( $I_D$ ) of 1L MoS<sub>2</sub> FET with Al contacts. Due to the higher Schottky barrier of monolayer device, thermionic emission region was not observed even at high temperature. Measurements at higher temperature destroy monolayer device. (b) SBH of 1L MoS<sub>2</sub> FET at different gate voltage. SBH for a flat band condition could not be extracted due to difficulty in high temperature measurement. (c) Temperature dependence of drain current ( $I_D$ ) of 2L MoS<sub>2</sub> FET with Al contacts. (b) SBH of 2L MoS<sub>2</sub> FET at different gate voltage. It should be noted that lowest limit of SBH increases with decreasing thickness of MoS<sub>2</sub> at high gate voltage.**

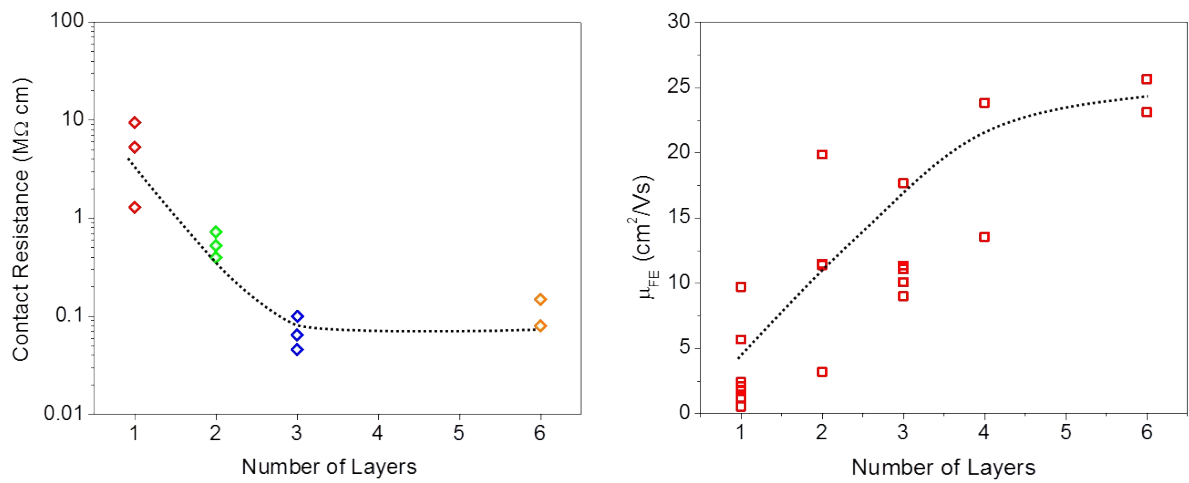

**Fig. S4. (a) Contact resistance and field-effect mobility of MoS<sub>2</sub> with 1L to 6L.**
